# Supplementary material for: Transcriptomic and proteomic profiling of NaV1.8-expressing mouse nociceptors
Source: PubMed Central journal article supplement (PMC9593034; doi:10.3389/fnmol.2022.1002842), 2022-10-11
Supplement: Image_1.pdf [file Image_1.pdf]

## Supplementary Figure 1

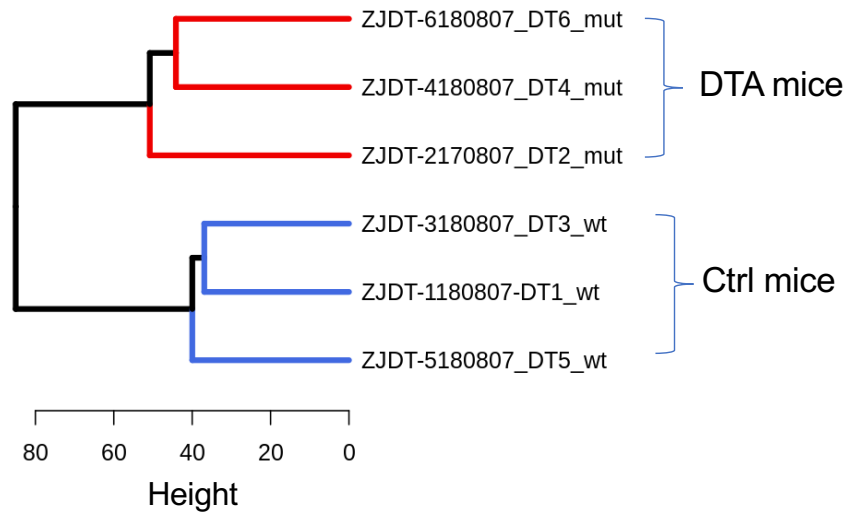

**Supplementary Figure 1.** Cluster analysis of transcriptome data. Hierarchical clustering shows that samples fall into two clear groups, i.e. DTA mutant mice (in red) and littermate control mice (in blue).
