# Supplementary material for: Transcriptomic and proteomic profiling of NaV1.8-expressing mouse nociceptors
Source: PubMed Central journal article supplement (PMC9593034; doi:10.3389/fnmol.2022.1002842), 2022-10-11
Supplement: Image_2.pdf [file Image_2.pdf]

## Supplementary Figure 2

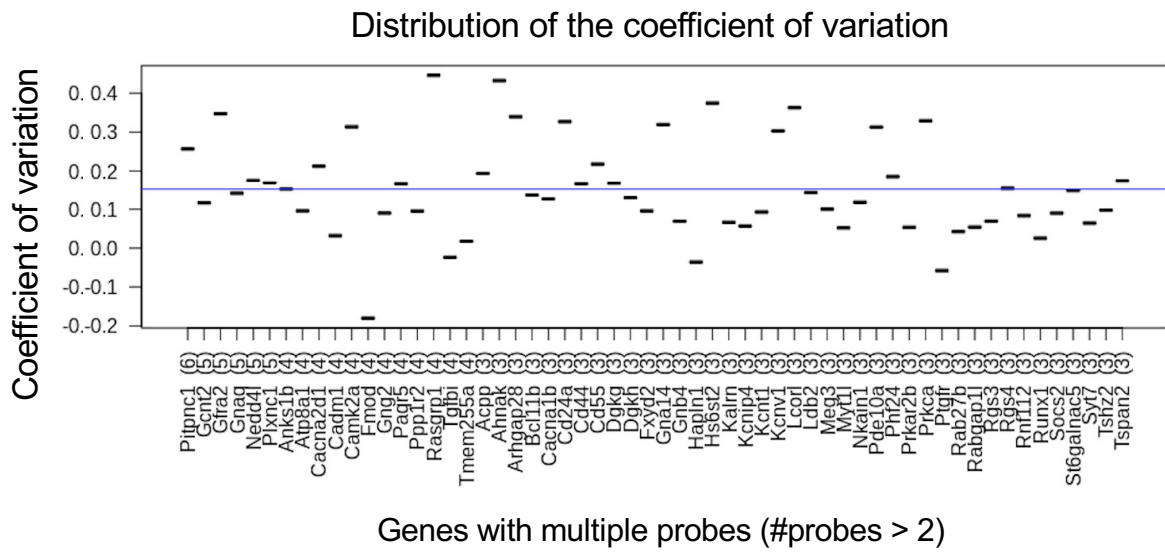

**Supplementary Figure 2.** Low variability between probes representing the same gene. Distribution of the coefficient of variation (CV) for genes with multiple probes values. CVs are calculated using significance ( $p < 0.05$ ). Genes with more than 2 probes are shown in this figure. Numbers near the gene symbols show how many probes represented each gene. Blue line shows the average CV.
