# Supplementary material for: Transcriptomic and proteomic profiling of NaV1.8-expressing mouse nociceptors
Source: PubMed Central journal article supplement (PMC9593034; doi:10.3389/fnmol.2022.1002842), 2022-10-11
Supplement: Image_3.pdf [file Image_3.pdf]

## Supplementary Figure 3

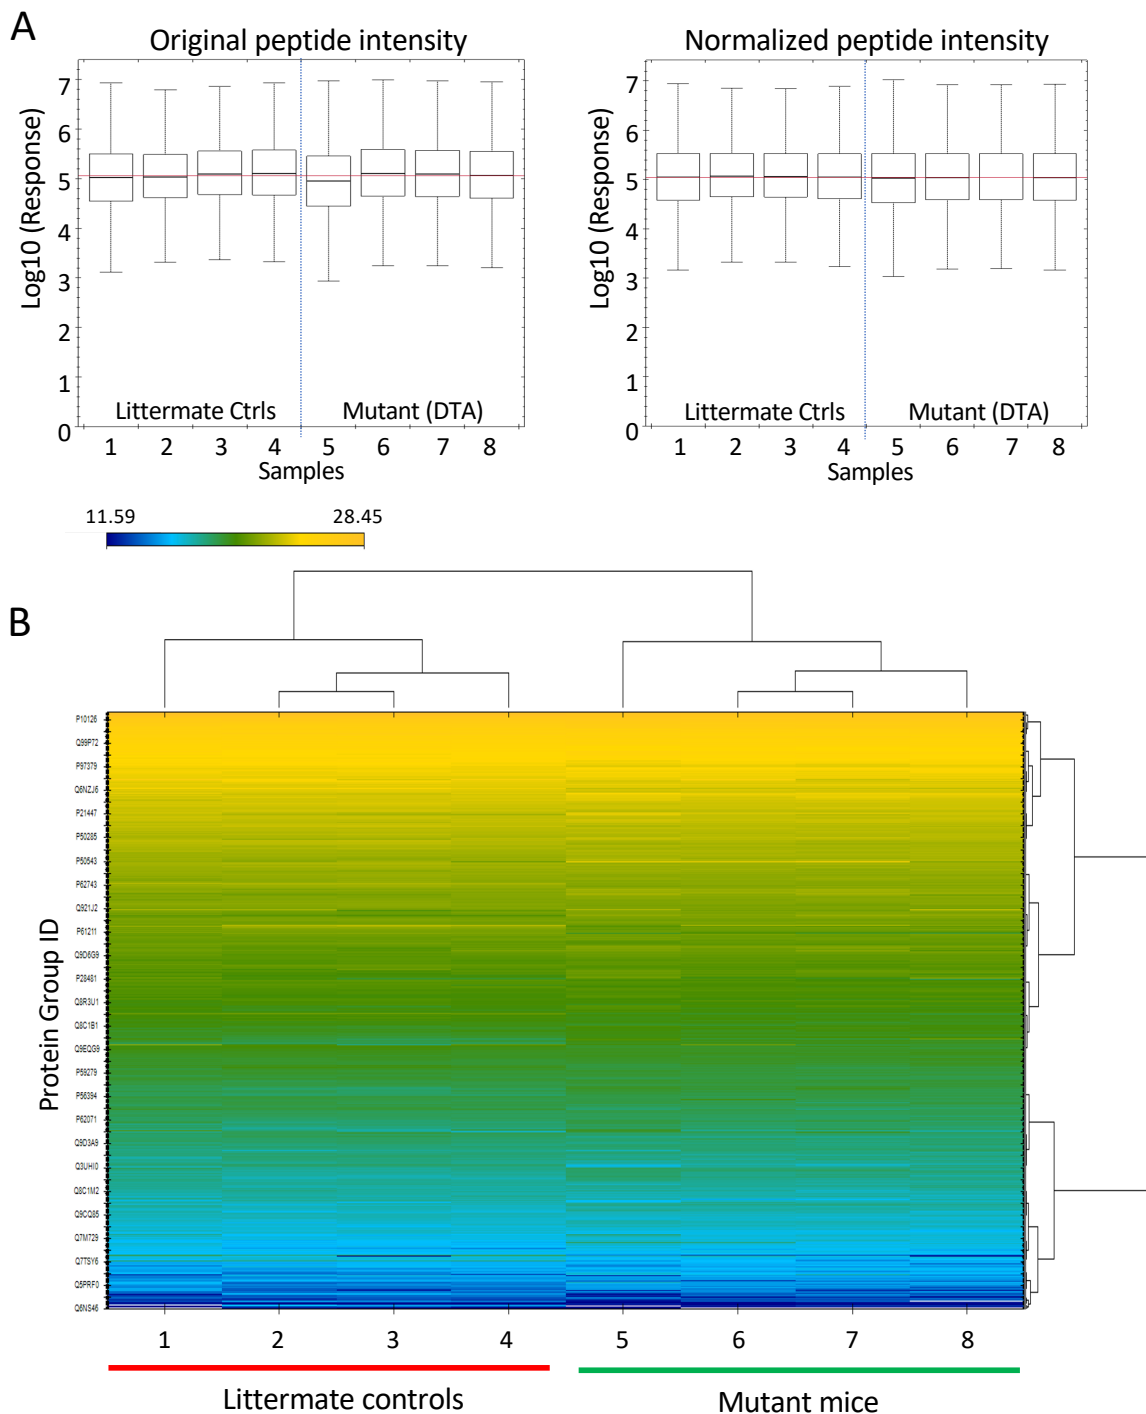

**Supplementary Figure 3. (A) Peptide Intensity.** Data quality was analyzed using directDIA analysis in Spectronaut X with default setting and local regression normalization (Callister et al., 2006 DOI: [10.1021/pr050300i](https://doi.org/10.1021/pr050300i)). Normalization of the peptide intensity was performed to compensate for loading and instrument performance fluctuations. A comparison of peptide intensities (log<sub>10</sub>) of original data (left panel) and normalized data (right panel) demonstrates that acquisition stability was good and minor normalization was carried out. **(B) Heat map and unsupervised clustering of each sample on the level of protein group data.** Note the separation between the littermate control (Ctrl) and mutant samples. The heatmap was generated using heatmap.2 of the ggplot2 package (<https://ggplot2.tidyverse.org>) in the statistical package R. Distance was calculated using the “manhattan” method, the clustering using “ward.D”
