# Supplementary material for: Transcriptomic and proteomic profiling of NaV1.8-expressing mouse nociceptors
Source: PubMed Central journal article supplement (PMC9593034; doi:10.3389/fnmol.2022.1002842), 2022-10-11
Supplement: Table_11.pdf [file Table_11.pdf]

## Supplementary Table 11: 29 Transcripts/Proteins enriched in Na<sub>v</sub>1.8-expressing DRG Neurons

### Transcriptome vs Proteome

| No | Symbol   | Transcripts            |           | Proteins               |          |
|----|----------|------------------------|-----------|------------------------|----------|
|    |          | Fold-Change (DTA/Ctrl) | FDR P-Val | Fold-Change (DTA/Ctrl) | Q-value  |
| 1  | Acpp     | -7.518104              | 0.000037  | -10.653613             | 0        |
| 2  | Arhgap28 | -4.390761              | 0.000004  | -4.594784              | 0.004716 |
| 3  | Camk2a   | -2.238842              | 0.000171  | -16.040381             | 0        |
| 4  | Clgn     | -2.155886              | 0.000442  | -3.10821               | 0        |
| 5  | Dgkg     | -5.017199              | 0.000021  | -3.081118              | 0.000018 |
| 6  | Dgkh     | -4.136786              | 0.000022  | -3.822114              | 0        |
| 7  | Dgki     | -2.684322              | 0.000042  | -5.568794              | 0        |
| 8  | Dgkz     | -3.750441              | 0.000018  | -3.69622               | 0        |
| 9  | Eml1     | -5.175388              | 0.000004  | -3.56907               | 0        |
| 10 | Fxyd2    | -2.583285              | 0.000034  | -2.937812              | 0        |
| 11 | Gfra2    | -3.904673              | 0.000016  | -2.711791              | 0.000002 |
| 12 | Kcnt1    | -2.720936              | 0.000047  | -3.865256              | 0.000266 |
| 13 | Nedd4l   | -3.935441              | 0.000011  | -4.087266              | 0        |
| 14 | Osbpl3   | -4.304144              | 0.000129  | -3.400133              | 0        |
| 15 | P2rx3    | -11.08769              | 0.000004  | -6.823287              | 0.000479 |
| 16 | Phf24    | -3.669058              | 0.00003   | -4.387869              | 0        |
| 17 | Pirt     | -2.90374               | 0.000019  | -3.61859               | 0.000003 |
| 18 | Plcb3    | -4.139667              | 0.000009  | -2.890539              | 0        |
| 19 | Plcx3    | -2.570047              | 0.00003   | -2.841155              | 0.004504 |
| 20 | Pqlc3    | -2.368454              | 0.000021  | -2.247864              | 0.000009 |
| 21 | Prkcd    | -9.890721              | 0.000026  | -3.215095              | 0        |
| 22 | Prkcq    | -7.28081               | 0.000093  | -2.083968              | 0.000023 |
| 23 | Pthr1    | -2.479172              | 0.000095  | -4.588019              | 0.029506 |
| 24 | Rgs10    | -3.480715              | 0.000021  | -2.926472              | 0        |
| 25 | Rgs3     | -2.911075              | 0.00002   | -9.058443              | 0        |
| 26 | Scg3     | -2.636118              | 0.000022  | -3.268107              | 0        |
| 27 | Scn10a   | -50.14744              | 0.000082  | -4.983505              | 0.000001 |
| 28 | Scn11a   | -24.20722              | 0.00002   | -123.96514             | 0        |
| 29 | Trpv1    | -3.522796              | 0.000262  | -4.578864              | 0.003117 |

### Single-cell RNA-Seq (1-10)

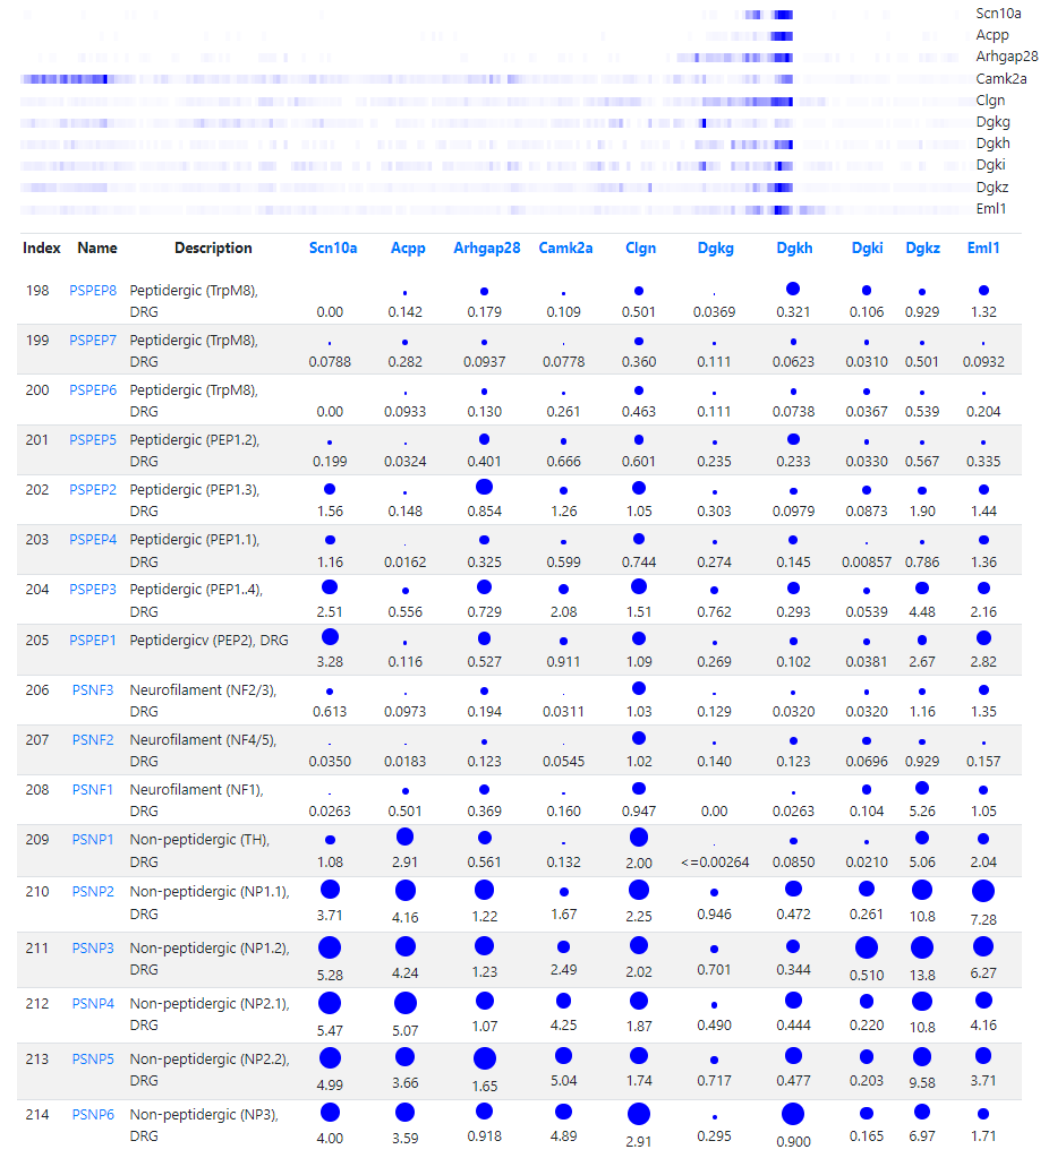

Data was extracted from MouseBrain.org

# Supplementary Table 11: 29 Transcripts/Proteins enriched in Na<sub>v</sub>1.8-expressing DRG Neurons

## Single-cell RNA-Seq (11-20)

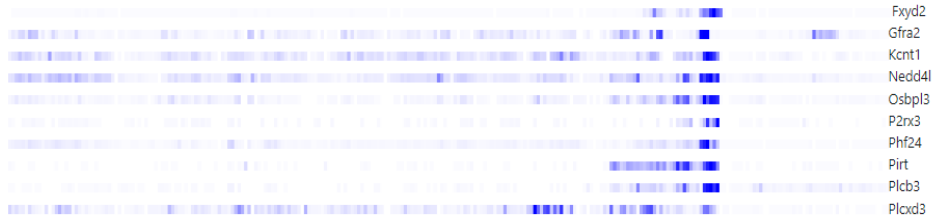

| Index | Name   | Description                  | Fxyd2 | Gfra2  | Kcnt1 | Nedd4l | Osbpl3 | P2rx3  | Phf24 | Pirt | Plcb3  | Plcx3  |
|-------|--------|------------------------------|-------|--------|-------|--------|--------|--------|-------|------|--------|--------|
| 198   | PSPEP8 | Peptidergic (TrpM8), DRG     | 0.618 | 0.179  | 0.00  | 0.178  | 1.03   | 0.00   | 2.57  | 6.75 | 0.179  | 0.107  |
| 199   | PSPEP7 | Peptidergic (TrpM8), DRG     | 0.333 | 0.281  | 0.00  | 0.141  | 0.359  | 0.00   | 1.05  | 2.09 | 0.0624 | 0.266  |
| 200   | PSPEP6 | Peptidergic (TrpM8), DRG     | 0.428 | 0.148  | 0.00  | 0.278  | 0.500  | 0.0368 | 0.737 | 3.44 | 0.0738 | 0.0930 |
| 201   | PSPEP5 | Peptidergic (PEP1.2), DRG    | 6.18  | 0.00   | 0.200 | 0.333  | 2.00   | 0.00   | 0.737 | 5.80 | 0.233  | 0.167  |
| 202   | PSPEP2 | Peptidergic (PEP1.3), DRG    | 14.2  | 0.0302 | 0.372 | 1.20   | 3.42   | 0.0881 | 1.95  | 14.0 | 0.716  | 0.314  |
| 203   | PSPEP4 | Peptidergic (PEP1.1), DRG    | 4.85  | 0.0162 | 0.333 | 0.375  | 1.95   | 0.0595 | 1.39  | 7.32 | 0.453  | 0.291  |
| 204   | PSPEP3 | Peptidergic (PEP1.4), DRG    | 15.7  | 0.0650 | 0.553 | 2.81   | 3.17   | 0.130  | 2.59  | 12.6 | 1.75   | 0.0870 |
| 205   | PSPEP1 | Peptidergic (PEP2), DRG      | 5.85  | 0.0650 | 0.359 | 2.47   | 3.64   | 0.141  | 3.64  | 13.7 | 0.616  | 0.0260 |
| 206   | PSNF3  | Neurofilament (NF2/3), DRG   | 0.808 | 0.258  | 0.579 | 0.774  | 0.806  | 0.290  | 2.61  | 5.94 | 0.193  | 0.0320 |
| 207   | PSNF2  | Neurofilament (NF4/5), DRG   | 0.523 | 0.123  | 0.105 | 0.438  | 0.193  | 0.00   | 1.49  | 2.81 | 0.176  | 0.0880 |
| 208   | PSNF1  | Neurofilament (NF1), DRG     | 34.4  | 0.921  | 0.367 | 0.158  | 0.920  | 0.00   | 2.31  | 2.11 | 0.395  | 0.0260 |
| 209   | PSNP1  | Non-peptidergic (TH), DRG    | 60.0  | 5.68   | 0.411 | 3.48   | 1.74   | 0.0813 | 15.8  | 3.53 | 0.0426 | 0.415  |
| 210   | PSNP2  | Non-peptidergic (NP1.1), DRG | 55.1  | 5.80   | 1.97  | 2.83   | 5.61   | 0.305  | 18.9  | 10.6 | 2.18   | 1.28   |
| 211   | PSNP3  | Non-peptidergic (NP1.2), DRG | 98.2  | 5.80   | 2.41  | 3.58   | 3.61   | 0.965  | 21.4  | 14.3 | 2.46   | 1.34   |
| 212   | PSNP4  | Non-peptidergic (NP2.1), DRG | 119   | 0.0441 | 2.20  | 3.91   | 5.29   | 0.244  | 4.31  | 16.4 | 2.60   | 0.756  |
| 213   | PSNP5  | Non-peptidergic (NP2.2), DRG | 80.8  | 0.0232 | 1.84  | 2.48   | 5.12   | 0.556  | 10.3  | 14.5 | 2.02   | 0.455  |
| 214   | PSNP6  | Non-peptidergic (NP3), DRG   | 65.3  | 0.0673 | 1.03  | 3.52   | 4.72   | 1.21   | 3.82  | 7.19 | 2.59   | 0.0610 |

## Single-cell RNA-Seq (21-29)

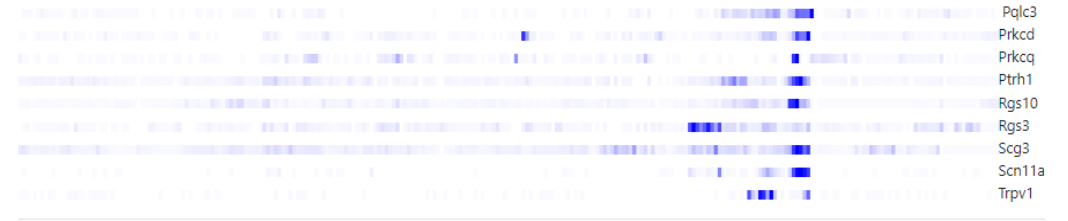

| Index | Name   | Description                  | Pqlc3  | Prkcd  | Prkcq  | Ptrh1  | Rgs10 | Rgs3   | Scg3  | Scn11a | Trpv1  |
|-------|--------|------------------------------|--------|--------|--------|--------|-------|--------|-------|--------|--------|
| 198   | PSPEP8 | Peptidergic (TrpM8), DRG     | 0.501  | 0.499  | 0.00   | 0.0712 | 10.2  | 0.0710 | 1.03  | 0.00   | 2.21   |
| 199   | PSPEP7 | Peptidergic (TrpM8), DRG     | 0.297  | 0.139  | 0.00   | 0.0472 | 13.1  | 0.109  | 0.296 | 0.00   | 0.672  |
| 200   | PSPEP6 | Peptidergic (TrpM8), DRG     | 0.390  | 0.333  | 0.0183 | 0.0927 | 12.6  | 0.111  | 0.261 | 0.0552 | 0.314  |
| 201   | PSPEP5 | Peptidergic (PEP1.2), DRG    | 0.367  | 0.801  | 0.00   | 0.0671 | 2.78  | 0.133  | 1.00  | 0.434  | 3.07   |
| 202   | PSPEP2 | Peptidergic (PEP1.3), DRG    | 0.745  | 1.74   | 0.00   | 0.196  | 5.50  | 0.499  | 1.25  | 0.852  | 2.68   |
| 203   | PSPEP4 | Peptidergic (PEP1.1), DRG    | 0.582  | 1.71   | 0.00   | 0.120  | 2.60  | 0.487  | 0.829 | 1.55   | 1.02   |
| 204   | PSPEP3 | Peptidergic (PEP1.4), DRG    | 0.935  | 1.97   | 0.0211 | 0.120  | 5.21  | 0.337  | 1.06  | 0.901  | 3.26   |
| 205   | PSPEP1 | Peptidergic (PEP2), DRG      | 0.757  | 1.55   | 0.102  | 0.116  | 7.26  | 0.320  | 1.50  | 0.513  | 0.563  |
| 206   | PSNF3  | Neurofilament (NF2/3), DRG   | 0.0966 | 0.0658 | 0.00   | 0.00   | 6.11  | 0.0320 | 1.68  | 0.290  | 0.00   |
| 207   | PSNF2  | Neurofilament (NF4/5), DRG   | 0.105  | 0.0696 | 0.00   | 0.0530 | 3.01  | 0.0702 | 1.61  | 0.122  | 0.0522 |
| 208   | PSNF1  | Neurofilament (NF1), DRG     | 0.447  | 0.104  | 0.00   | 0.238  | 3.65  | 0.131  | 2.50  | 0.0256 | 0.00   |
| 209   | PSNP1  | Non-peptidergic (TH), DRG    | 0.560  | 0.665  | 0.0140 | 0.774  | 57.9  | 0.114  | 3.15  | 0.667  | 0.0143 |
| 210   | PSNP2  | Non-peptidergic (NP1.1), DRG | 1.60   | 2.56   | 2.77   | 1.43   | 61.1  | 0.222  | 9.77  | 3.39   | 0.0561 |
| 211   | PSNP3  | Non-peptidergic (NP1.2), DRG | 1.40   | 7.02   | 3.51   | 1.79   | 72.4  | 0.318  | 12.6  | 4.80   | 0.0522 |
| 212   | PSNP4  | Non-peptidergic (NP2.1), DRG | 1.42   | 5.09   | 0.0225 | 2.07   | 18.3  | 0.222  | 11.3  | 4.93   | 0.0443 |
| 213   | PSNP5  | Non-peptidergic (NP2.2), DRG | 1.36   | 4.97   | 0.00   | 0.933  | 20.2  | 0.114  | 7.14  | 4.57   | 0.728  |
| 214   | PSNP6  | Non-peptidergic (NP3), DRG   | 2.57   | 9.67   | 0.0154 | 0.539  | 11.1  | 0.469  | 9.43  | 3.77   | 1.95   |

Data was extract from MouseBrain.org
